# Supplementary material for: Association of polymorphism in genes encoding κB inhibitors (IκB) with susceptibility to and phenotype of Graves' disease: a case-control study
Source: Springer Nature journal article supplement (doi:10.1186/1756-6614-2-10), 2009-01-01
Supplement: Additional file 2 [file 1756-6614-2-10-s2.doc]

**Additional file 2**

**Title:** Distribution of *IKBL* genotypes in subgroups of patients with GD stratified by genetic parameters.

| Polymorphism | Genotypes | *HLA DRB1*03 allele* | | p/pc value** | *CTLA4* 49G *allele* | | p/pc value** | *PTPN22* 1858T *allele* | | p/pc value** |
| --- | --- | --- | --- | --- | --- | --- | --- | --- | --- | --- |
| present*  N=127(%) | absent  N=169(%) | present  N=347(%) | absent  N=134(%) | present  N=163(%) | absent  N=317(%) |
| *IKBL* | AA+AT | 117 (92.1) | 76 (45.0) | p< 10-4 | 227 (65.4) | 72 (53.7) | p=0.02 | 96 (58.9) | 203 (64.0) | NS |
| promoter -62 | TT | 10 (7.9) | 93 (55.0) | pc< 10-4 | 120 (34.6) | 62 (46.3) | pc=0.36 | 67 (41.1) | 67 (36.0) |  |
| *IKBL* | TT+CT | 119 (93.7) | 67 (39.6) | p< 10-4 | 221 (63.7) | 72 (53.7) | p=0.046 | 92 (56.4) | 201 (63.4) | NS |
| intron 1 | CC | 8 (6.3) | 102 (60.4) | pc< 10-4 | 126 (36.3) | 62 (46.3) | pc=828 | 71 (43.6) | 116 (36.6) |  |
| *IKBL* | TT | 122 (96.1) | 152 (89.9) | p=0.047 | 318 (91.6) | 123 (91.8) | NS | 148 (90.8) | 292 (92.1) | NS |
| exon 4 | CT | 5 (3.9) | 17 (10.1) | pc=0.846 | 29 (8.4) | 11 (8.2) |  | 15 (9.2) | 25 (7.9) |  |

N – number of patients available for analysis, NS – non significant.

*“present” = homozygotes possessing the investigated allele + heterozygotes.

** p values were calculated by chi-square (χ2) test using a 2x2 table to compare the frequency of alleles in subgroups of patients with Graves’ disease stratified by genetic parameters and corrected (pc) for the number of tests performed.
